# Supplementary material
Source: MDPI journal article supplement (https://www.mdpi.com/2073-445X/11/1/57)
Supplement: s1 [file s1]

**Table S1:** Detailed data for available water and water stored and released for each land use classes

|                                    | area (m2) |          |          |          | Surplus (P-Etr) (mm) |        |     |         | Available water (m³) |          |          |          | efficiency of<br>water<br>conservation<br>(%) | Water retained (m³) |          |          |          |
|------------------------------------|-----------|----------|----------|----------|----------------------|--------|-----|---------|----------------------|----------|----------|----------|-----------------------------------------------|---------------------|----------|----------|----------|
|                                    | t0        | t0_bis   | AAA      | AAA_bis  | t0                   | t0_bis | AAA | AAA_bis | t0                   | t0_bis   | AAA      | AAA_bis  |                                               | t0                  | t0_bis   | AAA      | AAA_bis  |
| Transitional woodland-shrub        | 6820436   | 6819908  | 6819383  | 6819383  | 414                  | 412    | 414 | 412     | 2821351              | 2807603  | 2821683  | 2809958  | 50                                            | 1410675             | 1403801  | 1410842  | 1404979  |
| Sclerophyllous vegetation          | 3646169   | 3645887  | 3645887  | 3645887  | 451                  | 448    | 449 | 448     | 1644554              | 1633945  | 1637634  | 1633945  | 33                                            | 542703              | 539202   | 540419   | 539202   |
| Industrial and commercial units    | 569481    | 1115945  | 1115945  | 1115945  | 495                  | 499    | 526 | 530     | 281716               | 556793   | 586486   | 591070   | 0                                             | 0                   | 0        | 0        | 0        |
| Sport and recreation ports         | 182179    | 181964   | 181147   | 181147   | 476                  | 474    | 475 | 474     | 86707                | 86205    | 86097    | 85818    | 0                                             | 0                   | 0        | 0        | 0        |
| Green urban areas                  | 3526611   | 3335009  | 3305823  | 3305823  | 499                  | 488    | 496 | 488     | 1760892              | 1628289  | 1639794  | 1613565  | 0                                             | 0                   | 0        | 0        | 0        |
| Water bodies                       | 545623    | 545581   | 545581   | 545581   | 423                  | 437    | 429 | 437     | 230863               | 238451   | 234072   | 238451   | 100                                           | 230863              | 238451   | 234072   | 238451   |
| Broad-leaved forest (fagus)        | 356360    | 356333   | 356333   | 356333   | 480                  | 478    | 485 | 478     | 170989               | 170421   | 172861   | 170421   | 66                                            | 112853              | 112478   | 114088   | 112478   |
| Broad-leaved forest (quercus)      | 64115779  | 64101489 | 64091623 | 64091623 | 383                  | 371    | 379 | 371     | 24580914             | 23757492 | 24272928 | 23753835 | 66                                            | 16223403            | 15679945 | 16020133 | 15677531 |
| Hygrophilus forest                 | 2457456   | 2450694  | 2450694  | 2450694  | 343                  | 309    | 337 | 309     | 843725               | 757186   | 825466   | 757186   | 66                                            | 556859              | 499743   | 544808   | 499743   |
| Coniferous forest                  | 4898171   | 4896466  | 4892868  | 4892868  | 445                  | 433    | 440 | 433     | 2178837              | 2119929  | 2151309  | 2118371  | 83                                            | 1808435             | 1759541  | 1785586  | 1758248  |
| Broad-leaved forest                | 3247      | 3247     | 3247     | 3247     | 436                  | 436    | 374 | 336     | 1417                 | 1417     | 1216     | 1090     | 66                                            | 935                 | 935      | 802      | 719      |
| Mixed forest (mainly coniferous)   | 1138563   | 1138475  | 1138475  | 1138475  | 408                  | 394    | 402 | 394     | 464678               | 448077   | 457185   | 448077   | 83                                            | 385682              | 371904   | 379464   | 371904   |
| Mixed forest (mainly broad leaved) | 20415488  | 20409092 | 20403736 | 20403736 | 332                  | 321    | 329 | 321     | 6784068              | 6550248  | 6703184  | 6548529  | 66                                            | 4477485             | 4323164  | 4424101  | 4322029  |
| Construction sites                 | 29630     | 22211    | 21948    | 21948    | 555                  | 569    | 552 | 569     | 16453                | 12648    | 12111    | 12499    | 0                                             | 0                   | 0        | 0        | 0        |
| Water courses                      | 484582    | 484370   | 484370   | 484370   | 409                  | 517    | 422 | 517     | 197964               | 250230   | 204495   | 250230   | 100                                           | 197964              | 250230   | 204495   | 250230   |
| Shrubby buffer strips              | 0         | 0        | 253377   | 253377   |                      |        | 414 | 412     | 0                    | 0        | 104841   | 104405   | 50                                            | 0                   | 0        | 52420    | 52203    |
| Arboreous buffer strips            | 0         | 0        | 77953    | 74707    |                      |        | 374 | 336     | 0                    | 0        | 29191    | 25079    | 66                                            | 0                   | 0        | 19266    | 16552    |
| Continue grasslands                | 18423992  | 18376355 | 20388939 | 65195467 | 512                  | 519    | 514 | 496     | 9433291              | 9536419  | 10476591 | 32334624 | 33                                            | 3112986             | 3147018  | 3457275  | 10670426 |
| Discontinue grasslands             | 2591468   | 2539719  | 2528259  | 2528259  | 506                  | 518    | 511 | 518     | 1312033              | 1315933  | 1290751  | 1310494  | 33                                            | 432971              | 434258   | 425948   | 432463   |
| Road and rail networks             | 5783912   | 5699318  | 5697768  | 5697768  | 475                  | 548    | 488 | 548     | 2748355              | 3125495  | 2782720  | 3125062  | 0                                             | 0                   | 0        | 0        | 0        |
| Bare rocks                         | 2280401   | 2280224  | 2268985  | 2268985  | 576                  | 613    | 588 | 613     | 1312878              | 1398039  | 1333049  | 1391213  | 0                                             | 0                   | 0        | 0        | 0        |
| Arable land                        | 86638119  | 85617784 | 84065247 | 39258719 | 490                  | 495    | 491 | 505     | 42463501             | 42409826 | 41290007 | 19818072 | 17                                            | 7218795             | 7209670  | 7019301  | 3369072  |
| Arable land-bare surface           | 752582    | 720287   | 0        | 0        | 521                  | 528    |     |         | 392232               | 380134   | 0        | 0        | 17                                            | 66679               | 64623    | 0        | 0        |
| Complex cultivation patterns       | 539971    | 539929   | 526127   | 526127   | 510                  | 512    | 511 | 512     | 275443               | 276233   | 268780   | 269171   | 33                                            | 90896               | 91157    | 88697    | 88826    |
| Urban fabric                       | 1240825   | 2230311  | 2195657  | 2195657  | 507                  | 542    | 538 | 555     | 629019               | 1209189  | 1181591  | 1219161  | 0                                             | 0                   | 0        | 0        | 0        |
| Vineyards                          | 183125    | 183111   | 0        | 0        | 539                  | 560    |     |         | 98767                | 102469   | 0        | 0        | 50                                            | 49384               | 51235    | 0        | 0        |
| Grassing vineyards                 | 0         | 0        | 178867   | 178867   |                      |        | 516 | 514     | 0                    | 0        | 92329    | 91980    | 50                                            | 0                   | 0        | 46165    | 45990    |
